# Supplementary material for: Phenotypic and Epigenetic Adaptations of Cord Blood CD4+ T Cells to Maternal Obesity
Source: Front Immunol. 2021 Apr 12;12:617592. doi: 10.3389/fimmu.2021.617592 (PMC8071865; doi:10.3389/fimmu.2021.617592)
Supplement: Supplementary file 6 [file Table_1.xlsx]

## Sheet: Sheet1
Supp Table1: Luminex data from cell culture supernatants. 60,000 naïve CD4 T cells stimulated with PMA.Ionomycin
Sample	PD-L1	Eotaxin	MIP-3b	MCP-1	MIP-3a	MIP-1a	MIP-1b	CD40 L	Fractalkine	GROa	IP-10	GROb	IL-8	EGF	Flt-3 L	G-CSF	GM-CSF	Granzyme B	IFNa	IFNb	IFNy	IL-10	IL-12 p70	IL-13	IL-15	IL-17A	IL-17E	IL-1b	IL-1ra	IL-2	IL-3	IL-33	IL-4	IL-5	IL-6	IL-7	PDGF-AA	PDGF-AB/BB	RANTES	TGF-a	TNF-a	TRAIL	VEGF	FGF-basic	IL-1a
Lean1 NS	19.8957	3.04563	1.4652	3.18977	4.72474	88.7343	73.7685	418.645	68.4232	11.939	1.192	23.4582	218.889	3.10783	6.55635	3.9886	3.23711	9.00176	3.80858	1.64293	21.601	4.29589	4.26417	13.5006	0.542405	0.301082	6.96594	11.2866	22.1183	1.68036	7.8869	6.03857	0.139272	1.94887	66.6173	0.588474	19.4914	3.50306	137.976	4.49316	52.6265	12.4528	1.33999	5.69837	5.22162
Lean2 NS	18.6675	4.06368	1.33056	3.31979	3.46959	52.8529	34.1763	310.797	61.6777	11.6284	1.192	8.61751	119.887	4.54864	2.32507	3.9886	3.64609	7.15876	3.19093	1.64293	18.5166	2.62206	3.74873	13.5006	0.402333	0.301082	5.3135	0.912201	14.1515	1.28576	6.48179	6.03857	0.111523	1.94887	24.4984	0.588474	17.0479	3.50306	137.976	4.49316	14.7389	12.4528	1.02379	5.69837	5.22162
Lean3 NS	15.6095	4.67613	1.03136	3.18977	3.30051	9.44748	46.4317	296.014	53.1751	9.37347	1.192	5.17622	15.0089	4.54864	11.5144	3.9886	2.42228	6.54158	2.05597	1.64293	17.1854	1.6943	4.77761	10.0947	0.346721	0.301082	8.7551	1.01984	6.53214	0.991057	6.00454	6.03857	0.0835642	1.94887	2.4555	0.588474	13.6085	3.50306	137.976	4.49316	2.37949	12.4528	0.85784	5.69837	5.22162
Lean4 NS	13.7791	4.4755	0.546616	3.13737	2.63083	6.86057	46.4317	207.112	51.1381	9.37347	1.192	5.17622	6.67295	4.54864	11.5144	3.9886	2.42738	6.15541	2.51197	1.64293	15.4132	11.3245	4.77491	10.303	0.432474	2.27249	5.3135	1.76494	5.93015	0.601195	5.28303	6.03857	0.307438	3.3109	1.17174	0.462864	14.8519	3.50306	137.976	4.49316	2.04212	12.4528	0.516242	5.69837	5.22162
Lean1 PMA	148.366	72.3014	17.7212	18.8367	34.6434	984.747	837.413	3553.26	578.542	74.9598	17.0723	153.179	5394.86	31.4664	142.57	25.218	304.53	948.858	26.2352	4.74358	166.566	148.05	50.8069	119.966	6.05224	9.21366	44.9474	14.4391	71.2009	43976	164.468	12.86	2.18572	17.5287	113.199	4.67476	146.178	2.16673	116.201	3.89295	6754.5	7.57198	34.0218	19.3737	13.2286
Lean2 PMA	135.441	59.7928	14.2906	18.7189	63.9812	1003.02	643.042	3228.38	540.725	77.3687	22.8606	314.686	8365.21	21.6111	167.049	27.3375	2021.27	370.905	18.2107	3.61963	409.076	70.4645	36.7917	121.743	5.01989	9.21366	21.8542	30.7113	113.673	41278.7	151.589	16.1755	8.44201	19.1831	68.3905	5.03864	128.745	2.42728	217.622	3.89295	8328.61	1.7188	26.0316	18.1453	19.6841
Lean3 PMA	255.435	112.609	24.4786	32.4169	87.117	939.61	1106.81	5492.4	892.697	151.705	134.446	934.815	16174.3	38.8999	306.369	59.9095	1635.76	355.174	25.9352	6.20806	440.368	413.901	66.225	225.345	8.32609	14.7095	31.1495	8.79661	83.0807	83346.4	397.946	23.148	12.586	31.5516	98.4267	7.76218	180.154	3.90011	448.318	5.21005	20395.9	3.09385	36.0931	28.1474	23.8115
Lean4 PMA	220.562	112.609	24.4786	32.844	101.365	1477.6	1035.8	5491.84	919.57	134.928	103.849	522.978	18095.3	37.0271	317.677	66.7111	1439.72	351.703	30.4614	5.21919	389.527	270.561	71.2799	219.137	8.89263	14.7095	31.1495	27.7686	101.691	77827.3	207.798	25.1788	7.87518	31.5516	307.787	7.76218	159.879	3.4311	137.976	4.49316	23844.8	7.77335	49.522	28.1474	31.6965
Lean5 PMA	128.993	62.5606	14.9724	18.2467	56.9229	462.865	330.847	2869.98	511.521	77.3687	83.2749	211.809	5530.67	21.2822	144.7	33.2831	1207.54	240.1	16.7174	4.74358	327.275	122.65	36.7917	121.743	4.78276	9.21366	21.8542	7.33266	50.8317	33243.9	162.148	13.9637	8.76096	16.6551	38.4813	4.49335	96.8345	1.90156	137.976	6.2293	11536.8	1.7188	33.6495	18.1453	19.6841
Lean6 PMA	255.419	107.627	20.6168	32.4169	84.7433	388.739	281.37	5705.02	972.926	134.928	64.7839	466.236	8580.26	42.4729	233.246	37.4993	735.21	217.391	35.7806	6.51534	293.358	270.463	50.9777	205.918	7.90056	16.5765	38.5174	3.84181	108.368	63509.6	258.129	25.1788	5.77072	26.8214	36.1131	7.11279	208.963	2.9538	137.976	4.49316	12743.7	7.77335	37.4508	28.1474	27.9616
Obese1 NS	14.9989	3.12609	0.546616	3.13737	2.80455	7.9408	46.4317	246.936	51.0928	10.0827	1.192	5.17622	11.8701	4.54864	11.5144	3.9886	2.22062	6.69638	1.6038	1.64293	15.858	0.766543	3.74985	10.303	0.319261	4.24391	8.7551	1.76494	5.9739	0.698161	5.76662	6.03857	0.0835642	3.3109	1.40117	0.462864	13.9267	3.50306	137.976	4.49316	2.15541	12.4528	0.691893	5.69837	5.22162
Obese2 NS	17.4441	5.15094	1.03136	3.0842	3.63473	8.21364	46.4317	324.528	59.5517	9.37347	1.192	5.17622	11.434	4.54864	11.5144	3.9886	2.62755	7.62048	2.88525	1.64293	20.283	9.57337	3.49047	8.30119	0.346961	2.27249	8.7551	1.76494	6.72511	0.795655	6.95403	6.03857	0.335397	3.3109	1.86591	0.463491	16.4239	3.50306	137.976	4.49316	1.36726	12.4528	1.18394	5.69837	5.22162
Obese3 NS	16.2206	5.43886	0.703888	3.18977	2.97363	8.58135	46.4317	239.558	53.1751	10.7191	1.192	5.17622	11.6518	4.54864	11.5144	3.9886	2.42354	6.69638	2.05243	1.64293	16.9669	16.5247	4.26417	11.0766	0.319261	2.27249	7.68684	1.76494	5.9739	1.18915	6.00454	6.03857	0.0835642	3.3109	3.29408	0.462864	15.1825	3.50306	137.976	4.49316	1.81842	12.4528	0.85784	5.69837	5.22162
Obese4 NS	14.9989	5.15094	0.716817	3.0842	2.43411	6.82619	46.4317	224.526	51.0928	9.37347	1.192	5.17622	7.17213	4.54864	11.5144	3.9886	2.22062	6.15541	2.05243	1.64293	15.8562	16.5247	2.71898	10.303	0.29208	2.27249	8.7551	1.76494	4.83822	0.795655	5.52096	6.03857	0.0835642	3.3109	1.1164	0.462864	14.2433	3.50306	137.976	4.49316	1.47971	12.4528	0.516242	5.69837	5.22162
Obese5 NS	18.6691	3.04563	1.16788	3.18977	4.10324	7.68536	46.4317	377.948	61.7609	10.7191	1.192	5.17622	8.81325	3.46147	11.5144	3.9886	2.82921	7.92662	3.1179	0.911589	20.7192	10.4596	4.77848	11.4109	0.43043	0.504963	6.96594	1.9895	18.6021	0.795655	7.30072	6.03857	0.111313	1.94887	1.63264	0.651781	17.0375	3.50306	137.976	4.49316	2.0425	12.4528	1.01799	5.69837	5.22162
Obese6 NS	14.9989	2.10804	1.03136	3.13737	2.96505	7.57584	46.4317	268.366	56.3151	10.0827	1.192	5.17622	8.16786	4.54864	11.5144	3.9886	2.22062	7.00387	2.05243	1.64293	17.6295	8.64561	4.26417	10.303	0.319261	4.24391	8.7551	1.76494	7.81872	0.893149	6.24122	6.03857	0.0556051	3.3109	1.51643	0.525669	16.1101	3.50306	137.976	4.49316	1.93087	12.4528	0.691893	5.69837	5.22162
Obese1 PMA	22.3471	7.13918	1.47475	3.34487	7.19803	74.886	28.0062	471.424	82.0232	13.5746	5.54215	31.8347	829.346	3.76801	21.804	3.38333	43.9175	37.5163	2.27966	0.911589	38.2245	26.4057	5.29192	16.2717	0.71408	1.1108	8.7551	0.27473	8.55151	99404.5	20.8194	0.773146	0.441525	2.38168	3.17339	0.842541	20.7117	0.153252	137.976	4.49316	1209.47	12.4528	3.14075	3.55418	5.22162
Obese2 PMA	24.7987	7.80632	2.30638	3.54828	6.06731	142.647	126.342	555.252	89.1065	15.3536	10.8262	28.007	875.758	4.0572	25.5211	4.47436	127.922	47.5147	3.0381	0.541447	50.3553	23.2614	5.54874	18.7084	0.742134	1.1108	1.87189	1.3271	11.0383	99404.5	27.2519	1.27198	0.740507	2.71032	11.3345	0.906629	20.7224	0.20701	85.4213	4.49316	1732.44	6.5126	4.27086	1.40998	0.758931
Obese3 PMA	284.571	134.096	26.9504	34.9389	111.772	528.55	569.552	4958.02	893.487	151.187	45.784	216.569	6265.8	54.7323	213.458	57.4404	1184.37	312.915	34.2619	17.6425	325.564	270.463	91.4041	149.192	8.89698	25.8847	78.3612	12.9086	101.647	67985.1	306.608	27.085	4.03961	24.4371	74.0773	11.0472	185.947	5.27399	886.901	15.703	13559.5	28.951	57.3688	34.5705	48.2708
Obese4 PMA	267.06	121.344	23.8385	32.2017	101.344	602.008	701.323	5704.14	946.821	134.928	83.2704	281.711	11792.7	42.4729	268.251	52.8264	755.451	279.671	34.2944	8.53845	359.741	262.202	81.359	205.918	9.46626	16.5846	38.5174	19.8265	111.516	86435.2	378.757	25.1347	5.46662	20.0378	69.2664	7.76218	226.093	2.9538	264.848	5.92693	15680.7	3.09385	53.4567	30.4503	27.9616
Obese5 PMA	161.309	65.1709	15.3249	18.484	60.806	535.137	484.752	3228.76	587.35	82.0766	33.5199	215.63	5543.35	25.7164	153.262	31.2725	867.524	262.479	15.2511	5.86754	286.73	216.908	33.9766	125.333	5.09992	10.2509	17.3053	5.32181	60.1355	35930.8	153.344	13.9637	5.03575	17.5287	41.8277	3.95155	118.442	2.16673	137.976	3.89295	9388.72	1.7188	27.503	22.9008	17.6092
Obese6 PMA	167.855	76.6221	17.6223	19.4105	52.9778	515.995	453.78	3581.18	558.147	83.5019	111.693	171.755	4871.02	30.0931	144.7	43.9591	1353.05	289.525	18.1969	7.74594	573.683	272.945	45.1994	128.517	5.26133	14.369	46.7276	6.92776	71.0124	56054	477.634	14.9545	5.13842	20.6509	31.5087	5.77004	183.731	2.92999	452.9	12.0582	14759.3	16.0839	22.2671	21.6085	23.0802
